# Supplementary material for: Data-driven acceleration of photonic simulations
Source: PubMed Central journal article supplement (PMC6928023; doi:10.1038/s41598-019-56212-5), 2019-12-23
Supplement: 41598_2019_56212_MOESM1_ESM.pdf [file 41598_2019_56212_MOESM1_ESM.pdf]

# Supplementary to ‘Data-driven acceleration of photonic simulations’

Rahul Trivedi<sup>1,2,\*</sup>, Logan Su<sup>1</sup>, Jesse Lu<sup>2</sup>, Martin F. Schubert<sup>2</sup>, and Jelena Vuckovic<sup>1</sup>

<sup>1</sup>E. L. Ginzton Laboratory, Stanford University, Stanford, CA 94305, USA

<sup>2</sup>X, Mountain View, CA 94043, USA

\*rtrivedi@stanford.edu

## 1 Data-driven GMRES

By following the same steps as in GCROT (Generalized Conjugate Residual with inner Orthogonalization and outer Truncation), an efficient update rule can be developed for the data-driven GMRES iteration (defined by Eq. 3 of the main text). In this section, we provide more details on the derivation of this update rule.

*Notation and preliminaries:*

1. The system of equations being solved will be denoted by  $Af = b$ , with  $f$  being the unknown vector being solved for. We also denote by  $D$  the size of the system of equations i.e.  $A \in \mathbb{C}^{D \times D}$  and  $f, b \in \mathbb{C}^D$ . It will be assumed that  $A$  is invertible.
2. Given the vectors  $v_1, v_2 \dots v_N$  with which GMRES has to be accelerated (which are assumed to be linearly independent, but not necessarily orthogonal), we will denote by  $V$  the matrix that is formed with these vectors as its columns. Note that  $V \in \mathbb{C}^{D \times N}$  and  $\text{span}(v_1, v_2 \dots v_N) = \text{range}(V)$ .
3.  $\mathcal{K}_n(A, b)$  will denote the Krylov subspace of dimensionality  $n$  that is generated by the matrix  $A$  and the vector  $b$ :  $\mathcal{K}_n(A, b) = \text{span}(b, Ab, A^2b \dots A^{n-1}b)$ .
4.  $\tilde{A}$  and  $\tilde{b}$  are defined by:

$$\tilde{A} = P_{\perp}(Av_1, Av_2 \dots Av_N)A \quad (1a)$$

$$\tilde{b} = P_{\perp}(Av_1, Av_2 \dots Av_N)b \quad (1b)$$

where  $P_{\perp}(Av_1, Av_2 \dots Av_N)$  is the operator projecting a vector out of  $\text{span}(Av_1, Av_2 \dots Av_N)$ . For convenience, we will denote this operator by just  $P_{\perp}$ . We note that, in general,  $\tilde{A}$  is not sparse even if  $A$  is sparse, but for small  $N$  multiplication of  $\tilde{A}$  with a vector can be computed efficiently by first multiplying the vector by  $A$ , followed by projecting the resulting vector out of  $\text{span}(Av_1, Av_2 \dots Av_N)$ .

5. To conveniently work with  $P_{\perp}$ , we perform an incomplete QR decomposition on the matrix  $AV$  to obtain an orthogonal matrix  $C \in \mathbb{C}^{D \times N}$  and an upper triangular matrix  $R \in \mathbb{C}^{N \times N}$ :  $AV = CR$ . It then immediately follows that  $P_{\perp} = I - CC^{\dagger}$ . Moreover, it is also convenient to precompute and store  $R^{-1}$  (Note that if  $A$  is invertible, and  $v_1, v_2 \dots v_N$  are linearly independent then  $R$  is invertible).

*Arnoldi iteration:* The  $i^{\text{th}}$  iteration of data-driven GMRES approximates the solution to  $Af = b$  with  $f_i$ , where  $f_i$  is given by:

$$f_i = \underset{f \in \text{range}(V) \oplus \mathcal{K}_i(\tilde{A}, \tilde{b})}{\text{argmin}} \|Af - b\|^2 \quad (2)$$

One of the key ingredients of the GMRES iteration is the Arnoldi iteration which generates an orthonormal basis for the Krylov subspace  $\mathcal{K}_{i+1}(\tilde{A}, \tilde{b})$  from the orthonormal basis for the Krylov subspace  $\mathcal{K}_i(\tilde{A}, \tilde{b})$ . Denoting the orthonormal basis for  $\mathcal{K}_i(\tilde{A}, \tilde{b})$  by  $\{q_1, q_2 \dots q_i\}$ , note that  $\text{span}(q_1, q_2 \dots q_i, \tilde{A}q_i) = \mathcal{K}_{i+1}(\tilde{A}, \tilde{b})$ . Therefore,  $q_{i+1}$  can be computed by orthonormalizing  $\tilde{A}q_i$  against  $\{q_1, q_2 \dots q_i\}$ :

$$q_{i+1} = \frac{v_{i+1}}{\|v_{i+1}\|}, \text{ where } v_{i+1} = \tilde{A}q_i - \sum_{j=1}^i (q_j^\dagger \tilde{A}q_i) q_j \quad (3)$$

In our implementation, we assume  $q_1 = \tilde{b}/\|\tilde{b}\|$ , and use Eq. 3 to generate  $q_2, q_3 \dots$  and so on. Note that  $q_i \perp \text{span}(Av_1, Av_2 \dots Av_N) \forall i$ , or equivalently  $C^\dagger Q_i = 0 \forall i$ . Denoting by  $Q_i$  the matrix formed with the vectors  $q_1, q_2 \dots q_i$  as its columns ( $Q_i \in \mathbb{C}^{D \times i}$ ), the Arnoldi iteration can be expressed as the following relationship between  $Q_{i+1}$  and  $Q_i$ :

$$\tilde{A}Q_i = Q_{i+1}H_{i,i+1} \implies AQ_i = Q_{i+1}H_{i,i+1} + CC^\dagger AQ_i \quad (4)$$

where  $H_{i,i+1} \in \mathbb{C}^{(i+1) \times i}$  is an upper Hessenberg matrix defined by:

$$H_{i,i+1} = \begin{bmatrix} q_1^\dagger \tilde{A}q_1 & q_1^\dagger \tilde{A}q_2 & q_1^\dagger \tilde{A}q_3 & \dots & q_1^\dagger \tilde{A}q_i \\ \|v_2\| & q_2^\dagger \tilde{A}q_2 & q_2^\dagger \tilde{A}q_3 & \dots & q_2^\dagger \tilde{A}q_i \\ 0 & \|v_3\| & q_3^\dagger \tilde{A}q_3 & \dots & q_3^\dagger \tilde{A}q_i \\ 0 & 0 & \|v_4\| & \dots & q_4^\dagger \tilde{A}q_i \\ \vdots & \vdots & \vdots & \ddots & \vdots \\ 0 & 0 & 0 & \dots & \|v_{i+1}\| \end{bmatrix} \quad (5)$$

*Calculating  $f_i$ :* Consider now solving the optimization problem in Eq. 2. Since the optimization variable  $f$  is in the space  $\text{range}(V) \oplus \mathcal{K}_i(\tilde{A}, \tilde{b})$ , it can be expressed as:

$$f = VR^{-1}x + Q_i y \quad (6)$$

where  $x \in \mathbb{C}^N$  and  $y \in \mathbb{C}^i$ . Thus, it follows that:

$$\begin{aligned} \|Af - b\|^2 &= \|AVR^{-1}x + AQ_i y - b\|^2 \\ &= \left\| \begin{bmatrix} I & C^\dagger AQ_i \\ 0 & H_{i,i+1} \end{bmatrix} \begin{bmatrix} x \\ y \end{bmatrix} - b \right\|^2 \end{aligned} \quad (7)$$

wherein we have used  $AV = CR$  and Eq. 4. Note that since  $C$  and  $Q_{i+1}$  are independently orthogonal matrix, and  $C^\dagger Q_{i+1} = 0$ , it follows that  $\begin{bmatrix} C & Q_{i+1} \end{bmatrix}$  is an orthogonal matrix. Eq. 7 can now be further simplified to:

$$\|Af - b\|^2 = \left\| \begin{bmatrix} I & C^\dagger AQ_i \\ 0 & H_{i,i+1} \end{bmatrix} \begin{bmatrix} x \\ y \end{bmatrix} - \begin{bmatrix} C^\dagger b \\ Q_{i+1}^\dagger b \end{bmatrix} \right\|^2 + \|(I - CC^\dagger - Q_{i+1}Q_{i+1}^\dagger)b\|^2 \quad (8)$$

Therefore,  $f_i = VR^{-1}x_i + Q_i y_i$ , where

$$x_i, y_i = \underset{x, y}{\text{argmin}} \left\| \begin{bmatrix} I & C^\dagger AQ_i \\ 0 & H_{i,i+1} \end{bmatrix} \begin{bmatrix} x \\ y \end{bmatrix} - \begin{bmatrix} C^\dagger b \\ Q_{i+1}^\dagger b \end{bmatrix} \right\|^2 \quad (9)$$

We have thus reduced the problem of calculating  $f_i$ , which was a constrained least squares problem, to an unconstrained least squares problem (Eq. 9) of size  $i + N$ , which can be solved numerically (e.g. using QR factorization).

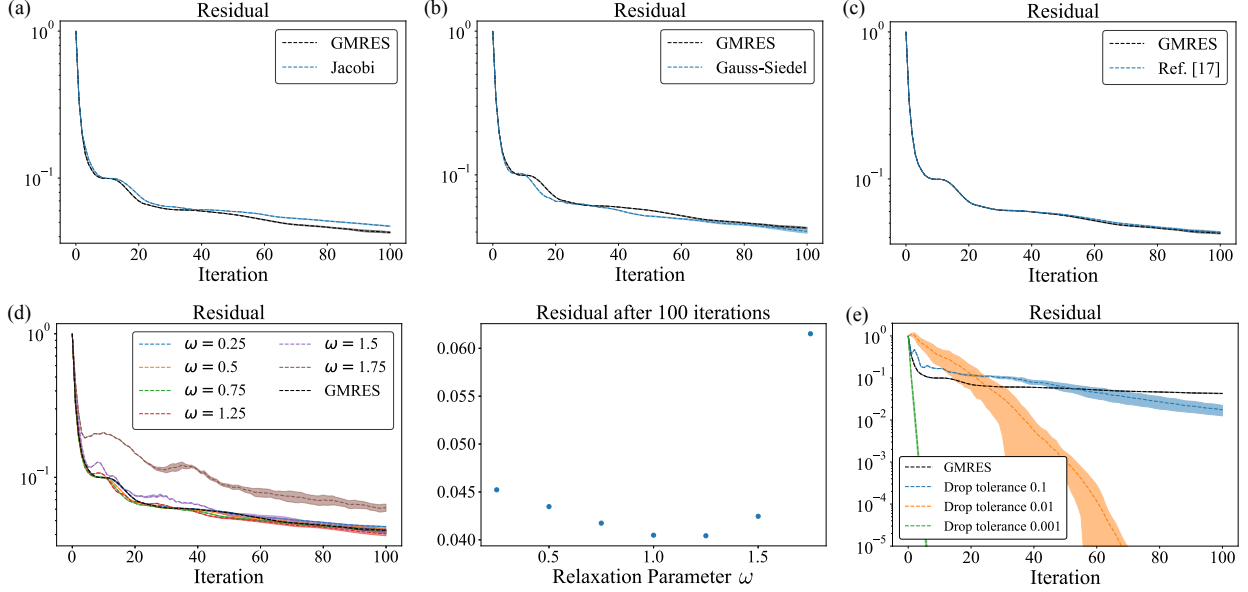

Figure 1: Performance of the different preconditioners described in section 2 on the evaluation dataset. (a) Jacobi preconditioner, (b) Gauss-Siedel preconditioner, (c) preconditioner from ref. [17] of main text (d) Symmetric over-relaxation (SOR) preconditioner for different relaxation parameter  $\omega$  and (e) Incomplete LU preconditioner for different drop tolerances.

## 2 Benchmarks for data-free preconditioners

Here we present the results of applying some data-free preconditioners on the simulation problem. Given a left preconditioner  $P_L$  and a right preconditioner  $P_R$ , the system of equations being solved is transformed from  $Af = b$  to  $A'f' = b'$  where:

$$A' = P_L A P_R, \quad b' = P_L b \quad \text{and} \quad f' = P_R^{-1} f \quad (10)$$

We study the following four preconditioners:

1. *Jacobi preconditioner*: The Jacobi preconditioner [1] is given by:

$$P_L = \mathcal{D}(A)^{-1} \quad \text{and} \quad P_R = I \quad (11)$$

where  $\mathcal{D}(A)$  is a diagonal matrix formed from the diagonal entries of the matrix  $A$ . The performance of Jacobi preconditioner on the evaluation dataset is shown in Fig. 1(a).

2. *Gauss-Siedel preconditioner*: The Gauss-Siedel preconditioner is given by:

$$P_L = [\mathcal{D}(A) + \mathcal{L}(A)]^{-1} \quad \text{and} \quad P_R = I \quad (12)$$

where  $\mathcal{L}(A)$  is a strictly lower-triangular matrix formed by the elements of  $A$  below the main diagonal. Note that application of this preconditioner requires the solution a lower triangular system of equations. The performance of the Gauss-Siedel preconditioner on the evaluation dataset is shown in Fig. 1(b).

3. *Preconditioner from ref. [17]*: This preconditioner is specific to Maxwell's equations.  $P_R$  and  $P_L$  are diagonal matrices constructed from the grid spacing (including the complex stretching due to PMLs) in the simulation domain. Details of this preconditioner can be found in ref. [17] for main text. The performance of this preconditioner on the evaluation dataset is shown in Fig. 1(c).

4. *Symmetric over-relaxation (SOR) preconditioner*: The SOR preconditioner [1] is given by:

$$P_L = [\mathcal{D}(A) + \omega\mathcal{L}(A)]^{-1} \text{ and } P_R = I \quad (13)$$

where  $\mathcal{L}(A)$  is a strictly lower-triangular matrix formed by the elements of  $A$  below the main diagonal and  $\omega$  is a tunable parameter (referred to as the relaxation parameter) in the preconditioner which can be between 0 to 2. Note that the SOR preconditioner for  $\omega = 1$  is identical to the Gauss-Siedel preconditioner. Additionally, application of the SOR preconditioner requires the solution of a lower triangular system of equations. The performance of the SOR preconditioner on the evaluation dataset is shown in Fig. 1(d) — we see that the best performance of SOR preconditioner on our dataset is achieved for  $\omega = 1.25$ .

5. *Incomplete LU*: This preconditioner seeks an upper and lower triangular matrix,  $U$  and  $L$  such that the product  $LU$  is approximately equal to the matrix  $A$  [1]. The preconditioner is then given by:

$$P_L = U^{-1}L^{-1} \text{ and } P_R = I \quad (14)$$

The deviation of the  $LU$  from  $A$  is controlled with a drop tolerance parameter — a larger drop tolerance implies a faster computation of  $L$  and  $U$  but a worse approximation to  $A$  and therefore a less useful preconditioner. The performance of incomplete LU preconditioner on the evaluation dataset is shown in Fig. 1(e) for drop tolerances of 0.1, 0.01 and 0.001.

## References

- [1] Yousef Saad. *Iterative methods for sparse linear systems*, volume 82. siam, 2003.
